# Supplementary material
Source: PubMed Central journal article supplement (PMC6851476)
Supplement: NIHMS1535971-supplement-1.pdf [file NIHMS1535971-supplement-1.pdf]

# Supporting Information

## Table of Contents

### Supporting Figures

**Figure S1.** NeBcon flowchart.

**Figure S2.** Comparison of homologous sequences detected by DeepMSA, HHblits and PSI-BLAST.

### Supporting Tables

**Table S1.** Comparison between the first models built by I-TASSER and C-I-TASSER for the 121 CASP13 targets.

**Table S2.** Comparison between the first models built by QUARK and C-QUARK for the 121 CASP13 targets.

**Table S3.** Template information for all 121 CASP13 targets.

**Table S4.** Contact prediction results for NeBcon and its component contact prediction methods for the 50 FM targets.

**Table S5.** Comparison between the contact prediction results for NeBcon with HHblits MSAs as input or DeepMSA MSAs as input for the 50 FM targets

**Table S6.** Deep MSA, contact prediction and structure modeling information for the 50 FM targets.

**Table S7.** Domain partition information for the 21 multi-domain targets.

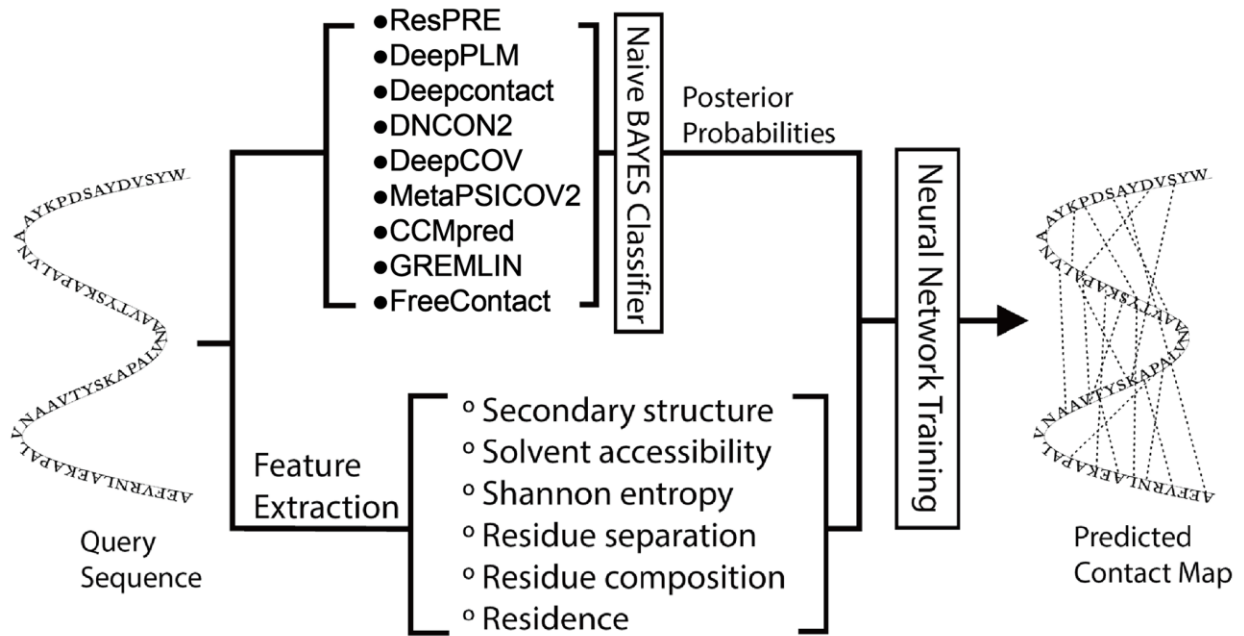

**Figure S1.** NeBcon flowchart.

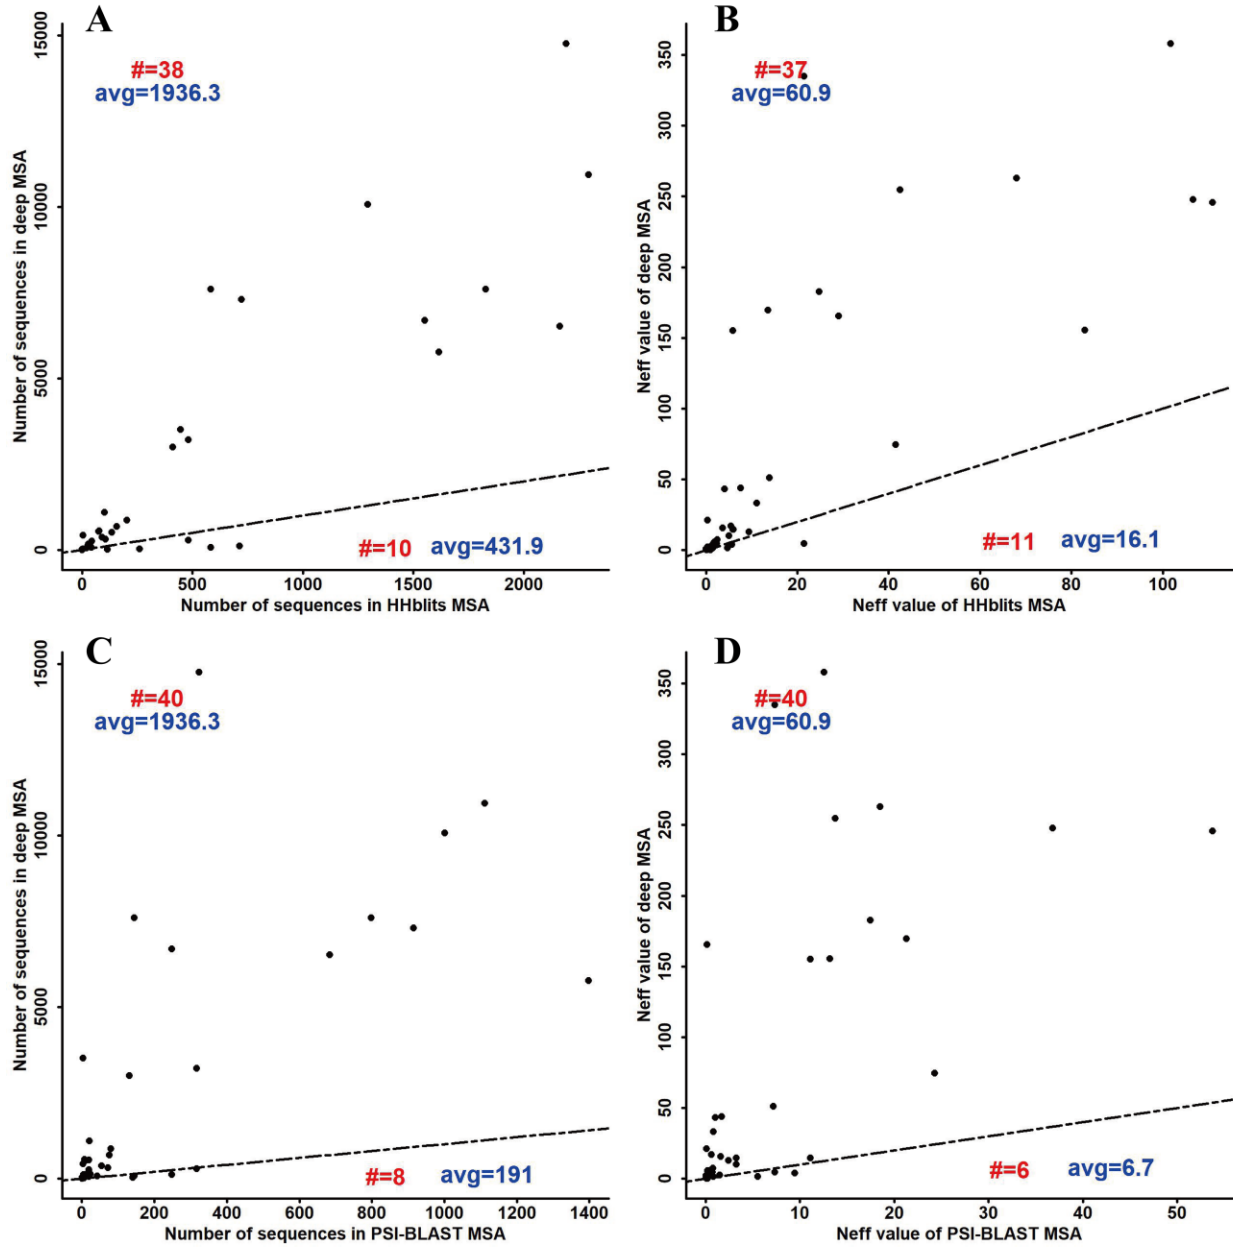

**Figure S2.** Comparison of homologous sequences detected by DeepMSA, HHblits and PSI-BLAST for the 50 FM targets. (A) Number of sequences detected by DeepMSA and HHblits; (B) Number of effective sequence (*Neff*) detected by DeepMSA and HHblits; (C) Number of sequences detected by DeepMSA and PSI-BLAST; (D) *Neff* detected by DeepMSA and PSI-BLAST. The black dashed-dotted line represents the diagonal line (i.e.  $y = x$ ). The red numbers are the number of points above or below the diagonal line. Here, HHblits was used with the default parameters to search the Uniclust30 database, while PSI-BLAST was used with the default parameters to search the NR (Dec 2017) database.

**Table S1.** Comparison between the first models built by I-TASSER and C-I-TASSER for the 121 CASP13 targets. The “Target” column contains the name of each target, the “Domain” column includes the domain information for each target, and the “Type” column contains the category of each target. The “I-TASSER first model” columns include the TM-scores, GDT-HA scores, and RMSDs of the first models built by I-TASSER, while the “C-I-TASSER first model” columns include the TM-scores, GDT-HA scores, and RMSDs of the first models built by C-I-TASSER.

| Target  | Domain     | Type     | I-TASSER first model |        |         | C-I-TASSER first model |        |         |
|---------|------------|----------|----------------------|--------|---------|------------------------|--------|---------|
|         |            |          | TM-score             | GDT-HA | RMSD(Å) | TM-score               | GDT-HA | RMSD(Å) |
| T0949   | T0949-D1   | FM/TBM   | 0.673                | 0.448  | 7.364   | 0.665                  | 0.424  | 6.568   |
| T0950   | T0950-D1   | FM       | 0.178                | 0.076  | 50.588  | 0.441                  | 0.144  | 15.398  |
| T0951   | T0951-D1   | TBM-easy | 0.973                | 0.776  | 1.034   | 0.972                  | 0.760  | 1.065   |
| T0953s1 | T0953s1-D1 | FM       | 0.252                | 0.164  | 10.749  | 0.397                  | 0.287  | 11.026  |
| T0953s2 | T0953s2-D1 | FM/TBM   | 0.268                | 0.261  | 9.086   | 0.358                  | 0.318  | 6.737   |
| T0953s2 | T0953s2-D2 | FM       | 0.228                | 0.128  | 15.617  | 0.590                  | 0.313  | 5.282   |
| T0953s2 | T0953s2-D3 | FM       | 0.201                | 0.117  | 12.589  | 0.310                  | 0.162  | 6.778   |
| T0954   | T0954-D1   | TBM-hard | 0.807                | 0.372  | 4.651   | 0.810                  | 0.390  | 5.294   |
| T0955   | T0955-D1   | FM/TBM   | 0.753                | 0.707  | 1.263   | 0.755                  | 0.689  | 1.337   |
| T0957s1 | T0957s1-D1 | FM       | 0.283                | 0.176  | 12.266  | 0.380                  | 0.215  | 10.201  |
| T0957s1 | T0957s1-D2 | TBM-hard | 0.374                | 0.333  | 8.271   | 0.495                  | 0.435  | 5.995   |
| T0957s2 | T0957s2-D1 | FM       | 0.511                | 0.253  | 5.830   | 0.532                  | 0.279  | 5.928   |
| T0958   | T0958-D1   | FM/TBM   | 0.454                | 0.334  | 5.049   | 0.547                  | 0.406  | 4.108   |
| T0959   | T0959-D1   | TBM-hard | 0.632                | 0.357  | 7.282   | 0.725                  | 0.394  | 4.181   |
| T0960   | T0960-D1   | FM       | 0.153                | 0.203  | 9.907   | 0.166                  | 0.219  | 8.792   |
| T0960   | T0960-D2   | FM       | 0.322                | 0.188  | 10.441  | 0.392                  | 0.247  | 9.451   |
| T0960   | T0960-D3   | TBM-hard | 0.740                | 0.553  | 3.018   | 0.765                  | 0.570  | 2.702   |
| T0960   | T0960-D4   | FM       | 0.155                | 0.148  | 22.936  | 0.230                  | 0.203  | 21.549  |
| T0960   | T0960-D5   | TBM-easy | 0.729                | 0.498  | 3.341   | 0.713                  | 0.507  | 3.493   |
| T0961   | T0961-D1   | TBM-easy | 0.961                | 0.700  | 2.115   | 0.960                  | 0.694  | 2.135   |
| T0962   | T0962-D1   | TBM-easy | 0.826                | 0.573  | 4.630   | 0.866                  | 0.589  | 3.866   |
| T0963   | T0963-D1   | FM       | 0.208                | 0.250  | 9.214   | 0.151                  | 0.234  | 8.557   |
| T0963   | T0963-D2   | FM       | 0.329                | 0.186  | 9.243   | 0.481                  | 0.305  | 4.899   |
| T0963   | T0963-D3   | TBM-hard | 0.715                | 0.470  | 2.698   | 0.756                  | 0.546  | 4.470   |
| T0963   | T0963-D4   | FM       | 0.168                | 0.145  | 22.089  | 0.239                  | 0.219  | 23.204  |
| T0963   | T0963-D5   | TBM-easy | 0.757                | 0.580  | 2.674   | 0.784                  | 0.590  | 2.389   |
| T0964   | T0964-D1   | TBM-hard | 0.759                | 0.550  | 3.931   | 0.687                  | 0.482  | 5.989   |
| T0965   | T0965-D1   | TBM-hard | 0.825                | 0.407  | 3.981   | 0.828                  | 0.393  | 3.885   |
| T0966   | T0966-D1   | TBM-hard | 0.840                | 0.339  | 3.862   | 0.839                  | 0.335  | 3.906   |
| T0967   | T0967-D1   | TBM-easy | 0.852                | 0.665  | 1.561   | 0.834                  | 0.639  | 1.708   |
| T0968s1 | T0968s1-D1 | FM       | 0.319                | 0.159  | 12.364  | 0.556                  | 0.292  | 5.832   |
| T0968s2 | T0968s2-D1 | FM       | 0.325                | 0.170  | 12.513  | 0.621                  | 0.357  | 3.875   |
| T0969   | T0969-D1   | FM       | 0.531                | 0.209  | 9.207   | 0.729                  | 0.288  | 6.077   |
| T0970   | T0970-D1   | FM/TBM   | 0.495                | 0.309  | 5.399   | 0.583                  | 0.374  | 4.694   |
| T0971   | T0971-D1   | TBM-easy | 0.941                | 0.714  | 1.130   | 0.921                  | 0.662  | 1.318   |
| T0973   | T0973-D1   | TBM-easy | 0.811                | 0.525  | 2.706   | 0.618                  | 0.377  | 10.191  |
| T0974s1 | T0974s1-D1 | TBM-easy | 0.723                | 0.598  | 2.453   | 0.716                  | 0.591  | 2.252   |
| T0974s2 | T0974s2-D1 | TBM-easy | 0.905                | 0.866  | 2.282   | 0.897                  | 0.838  | 2.507   |
| T0975   | T0975-D1   | FM       | 0.541                | 0.242  | 15.449  | 0.669                  | 0.277  | 6.442   |
| T0976   | T0976-D1   | TBM-easy | 0.838                | 0.588  | 2.166   | 0.832                  | 0.573  | 2.200   |
| T0976   | T0976-D2   | TBM-easy | 0.824                | 0.577  | 2.697   | 0.828                  | 0.575  | 2.681   |
| T0977   | T0977-D1   | TBM-easy | 0.897                | 0.551  | 2.677   | 0.900                  | 0.545  | 2.561   |
| T0977   | T0977-D2   | TBM-easy | 0.796                | 0.468  | 5.113   | 0.759                  | 0.404  | 4.527   |
| T0978   | T0978-D1   | FM/TBM   | 0.574                | 0.242  | 14.792  | 0.527                  | 0.237  | 17.747  |
| T0979   | T0979-D1   | TBM-hard | 0.352                | 0.304  | 40.548  | 0.441                  | 0.321  | 6.487   |
| T0980s1 | T0980s1-D1 | FM       | 0.352                | 0.243  | 14.489  | 0.290                  | 0.190  | 10.158  |
| T0980s2 | T0980s2-D1 | FM       | 0.175                | 0.242  | 12.840  | 0.153                  | 0.226  | 14.251  |
| T0981   | T0981-D1   | TBM-hard | 0.578                | 0.372  | 3.089   | 0.629                  | 0.439  | 3.802   |
| T0981   | T0981-D2   | FM       | 0.293                | 0.175  | 10.631  | 0.262                  | 0.150  | 9.058   |
| T0981   | T0981-D3   | FM/TBM   | 0.644                | 0.303  | 6.139   | 0.677                  | 0.308  | 5.308   |
| T0981   | T0981-D4   | TBM-hard | 0.586                | 0.399  | 4.896   | 0.591                  | 0.394  | 8.213   |
| T0981   | T0981-D5   | TBM-hard | 0.575                | 0.366  | 12.507  | 0.659                  | 0.402  | 6.050   |
| T0982   | T0982-D1   | TBM-easy | 0.863                | 0.602  | 2.321   | 0.888                  | 0.630  | 1.894   |
| T0982   | T0982-D2   | TBM-hard | 0.541                | 0.301  | 7.293   | 0.626                  | 0.358  | 7.043   |
| T0983   | T0983-D1   | TBM-easy | 0.942                | 0.714  | 1.680   | 0.947                  | 0.733  | 1.599   |
| T0984   | T0984-D1   | TBM-easy | 0.869                | 0.418  | 3.750   | 0.874                  | 0.420  | 3.874   |
| T0984   | T0984-D2   | TBM-easy | 0.790                | 0.549  | 3.679   | 0.782                  | 0.535  | 3.493   |
| T0985   | T0985-D1   | TBM-hard | 0.856                | 0.352  | 5.855   | 0.854                  | 0.347  | 5.685   |
| T0986s1 | T0986s1-D1 | FM/TBM   | 0.555                | 0.345  | 5.232   | 0.648                  | 0.413  | 3.684   |

|                |            |          |              |              |              |              |              |              |
|----------------|------------|----------|--------------|--------------|--------------|--------------|--------------|--------------|
| T0986s2        | T0986s2-D1 | FM       | 0.335        | 0.177        | 11.091       | 0.594        | 0.266        | 5.887        |
| T0987          | T0987-D1   | FM       | 0.243        | 0.089        | 15.493       | 0.620        | 0.262        | 5.811        |
| T0987          | T0987-D2   | FM       | 0.293        | 0.093        | 14.700       | 0.378        | 0.145        | 14.869       |
| T0989          | T0989-D1   | FM       | 0.541        | 0.280        | 9.886        | 0.547        | 0.302        | 11.475       |
| T0989          | T0989-D2   | FM       | 0.246        | 0.143        | 14.379       | 0.342        | 0.172        | 13.152       |
| T0990          | T0990-D1   | FM       | 0.378        | 0.286        | 10.896       | 0.567        | 0.415        | 5.348        |
| T0990          | T0990-D2   | FM       | 0.246        | 0.118        | 13.646       | 0.382        | 0.156        | 23.564       |
| T0990          | T0990-D3   | FM       | 0.211        | 0.103        | 16.560       | 0.212        | 0.090        | 18.412       |
| T0991          | T0991-D1   | FM       | 0.218        | 0.151        | 18.974       | 0.223        | 0.158        | 18.604       |
| T0992          | T0992-D1   | FM/TBM   | 0.704        | 0.456        | 4.940        | 0.722        | 0.463        | 3.272        |
| T0993s1        | T0993s1-D1 | TBM-easy | 0.835        | 0.516        | 8.828        | 0.843        | 0.542        | 8.877        |
| T0993s2        | T0993s2-D1 | TBM-easy | 0.694        | 0.462        | 4.073        | 0.704        | 0.475        | 3.620        |
| T0995          | T0995-D1   | TBM-easy | 0.878        | 0.605        | 2.229        | 0.904        | 0.638        | 3.833        |
| T0996          | T0996-D1   | TBM-easy | 0.782        | 0.568        | 4.161        | 0.778        | 0.554        | 4.155        |
| T0996          | T0996-D2   | TBM-easy | 0.823        | 0.620        | 2.857        | 0.815        | 0.598        | 3.190        |
| T0996          | T0996-D3   | TBM-easy | 0.820        | 0.603        | 2.991        | 0.823        | 0.605        | 3.003        |
| T0996          | T0996-D4   | TBM-easy | 0.739        | 0.521        | 3.345        | 0.750        | 0.547        | 7.353        |
| T0996          | T0996-D5   | TBM-easy | 0.739        | 0.533        | 4.043        | 0.738        | 0.531        | 4.100        |
| T0996          | T0996-D6   | TBM-easy | 0.866        | 0.654        | 1.923        | 0.879        | 0.676        | 1.840        |
| T0997          | T0997-D1   | FM/TBM   | 0.585        | 0.338        | 5.807        | 0.613        | 0.342        | 6.919        |
| T0998          | T0998-D1   | FM       | 0.177        | 0.075        | 21.969       | 0.206        | 0.095        | 22.314       |
| T0999          | T0999-D1   | TBM-easy | 0.985        | 0.825        | 0.958        | 0.986        | 0.832        | 0.943        |
| T0999          | T0999-D2   | TBM-hard | 0.785        | 0.341        | 4.581        | 0.795        | 0.346        | 4.813        |
| T0999          | T0999-D3   | TBM-easy | 0.784        | 0.494        | 3.816        | 0.793        | 0.499        | 3.664        |
| T0999          | T0999-D4   | TBM-easy | 0.971        | 0.757        | 1.064        | 0.964        | 0.758        | 1.320        |
| T0999          | T0999-D5   | TBM-easy | 0.889        | 0.524        | 2.522        | 0.888        | 0.518        | 2.517        |
| T1000          | T1000-D1   | TBM-easy | 0.946        | 0.871        | 1.030        | 0.945        | 0.874        | 1.098        |
| T1000          | T1000-D2   | FM       | 0.258        | 0.082        | 22.708       | 0.814        | 0.387        | 9.726        |
| T1001          | T1001-D1   | FM       | 0.637        | 0.338        | 4.341        | 0.631        | 0.336        | 4.360        |
| T1002          | T1002-D1   | TBM-easy | 0.795        | 0.678        | 1.817        | 0.794        | 0.661        | 1.694        |
| T1002          | T1002-D2   | TBM-easy | 0.797        | 0.678        | 2.182        | 0.803        | 0.712        | 2.256        |
| T1002          | T1002-D3   | TBM-easy | 0.781        | 0.632        | 3.334        | 0.792        | 0.622        | 6.496        |
| T1003          | T1003-D1   | TBM-easy | 0.935        | 0.761        | 7.678        | 0.934        | 0.737        | 7.736        |
| T1004          | T1004-D1   | TBM-easy | 0.769        | 0.587        | 2.824        | 0.775        | 0.587        | 2.692        |
| T1004          | T1004-D2   | TBM-easy | 0.675        | 0.484        | 2.726        | 0.705        | 0.474        | 2.463        |
| T1004          | T1004-D3   | TBM-easy | 0.909        | 0.764        | 2.239        | 0.925        | 0.830        | 3.446        |
| T1005          | T1005-D1   | FM/TBM   | 0.683        | 0.318        | 6.009        | 0.697        | 0.311        | 8.001        |
| T1006          | T1006-D1   | TBM-easy | 0.947        | 0.838        | 0.764        | 0.954        | 0.844        | 0.698        |
| T1008          | T1008-D1   | FM/TBM   | 0.366        | 0.263        | 9.971        | 0.362        | 0.263        | 9.030        |
| T1009          | T1009-D1   | TBM-hard | 0.875        | 0.445        | 5.073        | 0.876        | 0.442        | 5.063        |
| T1010          | T1010-D1   | FM       | 0.247        | 0.062        | 20.352       | 0.561        | 0.208        | 8.523        |
| T1011          | T1011-D1   | TBM-hard | 0.800        | 0.402        | 4.486        | 0.806        | 0.407        | 4.697        |
| T1011          | T1011-D2   | TBM-easy | 0.880        | 0.727        | 1.864        | 0.866        | 0.697        | 1.991        |
| T1013          | T1013-D1   | TBM-easy | 0.934        | 0.666        | 2.418        | 0.927        | 0.620        | 2.452        |
| T1014          | T1014-D1   | TBM-easy | 0.906        | 0.654        | 2.515        | 0.889        | 0.637        | 2.491        |
| T1014          | T1014-D2   | TBM-easy | 0.801        | 0.551        | 3.020        | 0.805        | 0.581        | 3.002        |
| T1015s1        | T1015s1-D1 | FM       | 0.256        | 0.168        | 12.424       | 0.466        | 0.332        | 9.767        |
| T1015s2        | T1015s2-D1 | TBM-hard | 0.653        | 0.421        | 5.945        | 0.716        | 0.465        | 4.303        |
| T1016          | T1016-D1   | TBM-easy | 0.880        | 0.614        | 3.786        | 0.880        | 0.614        | 3.654        |
| T1017s1        | T1017s1-D1 | TBM-easy | 0.758        | 0.543        | 3.060        | 0.764        | 0.536        | 2.941        |
| T1017s2        | T1017s2-D1 | FM       | 0.421        | 0.222        | 6.891        | 0.697        | 0.420        | 4.114        |
| T1018          | T1018-D1   | TBM-easy | 0.938        | 0.617        | 1.914        | 0.940        | 0.604        | 1.871        |
| T1019s1        | T1019s1-D1 | FM/TBM   | 0.391        | 0.319        | 6.761        | 0.596        | 0.483        | 2.569        |
| T1019s2        | T1019s2-D1 | TBM-easy | 0.691        | 0.472        | 3.627        | 0.773        | 0.560        | 3.142        |
| T1020          | T1020-D1   | TBM-easy | 0.872        | 0.454        | 3.075        | 0.879        | 0.455        | 2.999        |
| T1021s1        | T1021s1-D1 | TBM-hard | 0.810        | 0.525        | 3.633        | 0.822        | 0.532        | 3.418        |
| T1021s2        | T1021s2-D1 | TBM-hard | 0.858        | 0.440        | 3.338        | 0.797        | 0.415        | 15.146       |
| T1021s3        | T1021s3-D1 | FM       | 0.630        | 0.327        | 7.606        | 0.633        | 0.309        | 7.252        |
| T1021s3        | T1021s3-D2 | FM       | 0.356        | 0.199        | 7.042        | 0.436        | 0.271        | 10.858       |
| T1022s1        | T1022s1-D1 | FM       | 0.657        | 0.383        | 8.650        | 0.694        | 0.401        | 8.313        |
| T1022s1        | T1022s1-D2 | TBM-hard | 0.621        | 0.496        | 5.578        | 0.626        | 0.508        | 6.822        |
| T1022s2        | T1022s2-D1 | TBM-hard | 0.681        | 0.302        | 5.314        | 0.772        | 0.319        | 7.334        |
| <b>Average</b> |            |          | <b>0.624</b> | <b>0.417</b> | <b>7.396</b> | <b>0.674</b> | <b>0.444</b> | <b>6.193</b> |

**Table S2.** Comparison between the first models built by QUARK and C-QUARK for the 121 CASP13 targets. The “Target” column contains the name of each target, the “Domain” column includes the domain information for each target, and the “Type” column contains the category of each target. The “QUARK first model” columns include the TM-scores, GDT-HA scores, and RMSDs of the first models built by QUARK, while the “C-QUARK first model” columns include the TM-scores, GDT-HA scores, and RMSDs of the first models built by C-QUARK.

| Target  | Domain     | Type     | QUARK first model |        |         | C-QUARK first model |        |         |
|---------|------------|----------|-------------------|--------|---------|---------------------|--------|---------|
|         |            |          | TM-score          | GDT-HA | RMSD(Å) | TM-score            | GDT-HA | RMSD(Å) |
| T0949   | T0949-D1   | FM/TBM   | 0.667             | 0.424  | 6.556   | 0.672               | 0.450  | 6.778   |
| T0950   | T0950-D1   | FM       | 0.197             | 0.072  | 38.466  | 0.444               | 0.142  | 15.417  |
| T0951   | T0951-D1   | TBM-easy | 0.965             | 0.698  | 1.189   | 0.971               | 0.746  | 1.093   |
| T0953s1 | T0953s1-D1 | FM       | 0.396             | 0.299  | 11.395  | 0.399               | 0.284  | 10.859  |
| T0953s2 | T0953s2-D1 | FM/TBM   | 0.283             | 0.301  | 7.369   | 0.361               | 0.341  | 6.529   |
| T0953s2 | T0953s2-D2 | FM       | 0.176             | 0.108  | 17.029  | 0.469               | 0.191  | 5.938   |
| T0953s2 | T0953s2-D3 | FM       | 0.149             | 0.094  | 13.408  | 0.286               | 0.156  | 6.923   |
| T0954   | T0954-D1   | TBM-hard | 0.803             | 0.365  | 4.633   | 0.808               | 0.380  | 5.279   |
| T0955   | T0955-D1   | FM/TBM   | 0.696             | 0.652  | 1.551   | 0.731               | 0.671  | 1.464   |
| T0957s1 | T0957s1-D1 | FM       | 0.293             | 0.176  | 10.123  | 0.397               | 0.236  | 9.697   |
| T0957s1 | T0957s1-D2 | TBM-hard | 0.391             | 0.375  | 7.788   | 0.378               | 0.338  | 6.810   |
| T0957s2 | T0957s2-D1 | FM       | 0.395             | 0.195  | 11.983  | 0.532               | 0.302  | 6.135   |
| T0958   | T0958-D1   | FM/TBM   | 0.348             | 0.286  | 10.486  | 0.548               | 0.409  | 4.029   |
| T0959   | T0959-D1   | TBM-hard | 0.637             | 0.343  | 7.001   | 0.711               | 0.375  | 4.391   |
| T0960   | T0960-D1   | FM       | 0.185             | 0.273  | 8.268   | 0.158               | 0.211  | 8.841   |
| T0960   | T0960-D2   | FM       | 0.330             | 0.182  | 8.172   | 0.437               | 0.256  | 5.955   |
| T0960   | T0960-D3   | TBM-hard | 0.480             | 0.292  | 6.410   | 0.768               | 0.570  | 2.559   |
| T0960   | T0960-D4   | FM       | 0.172             | 0.125  | 20.746  | 0.236               | 0.207  | 21.746  |
| T0960   | T0960-D5   | TBM-easy | 0.697             | 0.507  | 3.914   | 0.714               | 0.486  | 3.353   |
| T0961   | T0961-D1   | TBM-easy | 0.962             | 0.675  | 1.963   | 0.962               | 0.689  | 1.948   |
| T0962   | T0962-D1   | TBM-easy | 0.815             | 0.540  | 4.767   | 0.839               | 0.571  | 3.937   |
| T0963   | T0963-D1   | FM       | 0.200             | 0.234  | 7.605   | 0.160               | 0.218  | 9.277   |
| T0963   | T0963-D2   | FM       | 0.314             | 0.171  | 8.429   | 0.459               | 0.265  | 4.913   |
| T0963   | T0963-D3   | TBM-hard | 0.316             | 0.167  | 8.904   | 0.773               | 0.586  | 4.505   |
| T0963   | T0963-D4   | FM       | 0.196             | 0.176  | 21.781  | 0.250               | 0.227  | 22.591  |
| T0963   | T0963-D5   | TBM-easy | 0.799             | 0.604  | 2.405   | 0.786               | 0.598  | 2.474   |
| T0964   | T0964-D1   | TBM-hard | 0.740             | 0.566  | 5.373   | 0.767               | 0.584  | 4.775   |
| T0965   | T0965-D1   | TBM-hard | 0.818             | 0.391  | 4.025   | 0.825               | 0.397  | 3.952   |
| T0966   | T0966-D1   | TBM-hard | 0.846             | 0.343  | 3.806   | 0.843               | 0.340  | 3.803   |
| T0967   | T0967-D1   | TBM-easy | 0.854             | 0.671  | 1.460   | 0.820               | 0.623  | 1.787   |
| T0968s1 | T0968s1-D1 | FM       | 0.375             | 0.220  | 11.194  | 0.563               | 0.305  | 5.660   |
| T0968s2 | T0968s2-D1 | FM       | 0.356             | 0.189  | 11.233  | 0.647               | 0.370  | 3.766   |
| T0969   | T0969-D1   | FM       | 0.186             | 0.061  | 18.466  | 0.752               | 0.302  | 5.410   |
| T0970   | T0970-D1   | FM/TBM   | 0.255             | 0.194  | 11.505  | 0.506               | 0.329  | 5.959   |
| T0971   | T0971-D1   | TBM-easy | 0.917             | 0.673  | 1.381   | 0.924               | 0.675  | 1.290   |
| T0973   | T0973-D1   | TBM-easy | 0.828             | 0.572  | 2.731   | 0.678               | 0.426  | 9.922   |
| T0974s1 | T0974s1-D1 | TBM-easy | 0.746             | 0.634  | 2.451   | 0.741               | 0.623  | 2.320   |
| T0974s2 | T0974s2-D1 | TBM-easy | 0.898             | 0.800  | 2.114   | 0.904               | 0.803  | 2.353   |
| T0975   | T0975-D1   | FM       | 0.469             | 0.199  | 15.776  | 0.667               | 0.273  | 6.549   |
| T0976   | T0976-D1   | TBM-easy | 0.832             | 0.594  | 2.188   | 0.839               | 0.590  | 2.136   |
| T0976   | T0976-D2   | TBM-easy | 0.816             | 0.552  | 2.670   | 0.830               | 0.597  | 2.677   |
| T0977   | T0977-D1   | TBM-easy | 0.882             | 0.493  | 2.760   | 0.899               | 0.549  | 2.634   |
| T0977   | T0977-D2   | TBM-easy | 0.794             | 0.461  | 4.751   | 0.777               | 0.415  | 3.679   |
| T0978   | T0978-D1   | FM/TBM   | 0.541             | 0.215  | 14.871  | 0.530               | 0.240  | 18.101  |
| T0979   | T0979-D1   | TBM-hard | 0.410             | 0.361  | 41.212  | 0.501               | 0.359  | 6.559   |
| T0980s1 | T0980s1-D1 | FM       | 0.233             | 0.190  | 12.627  | 0.540               | 0.339  | 7.124   |
| T0980s2 | T0980s2-D1 | FM       | 0.204             | 0.242  | 11.768  | 0.188               | 0.226  | 13.975  |
| T0981   | T0981-D1   | TBM-hard | 0.331             | 0.195  | 8.941   | 0.535               | 0.334  | 5.210   |
| T0981   | T0981-D2   | FM       | 0.235             | 0.156  | 10.506  | 0.246               | 0.156  | 9.399   |
| T0981   | T0981-D3   | FM/TBM   | 0.624             | 0.275  | 6.283   | 0.669               | 0.296  | 5.334   |
| T0981   | T0981-D4   | TBM-hard | 0.578             | 0.381  | 5.169   | 0.591               | 0.392  | 7.282   |
| T0981   | T0981-D5   | TBM-hard | 0.422             | 0.309  | 16.665  | 0.640               | 0.382  | 6.625   |
| T0982   | T0982-D1   | TBM-easy | 0.888             | 0.630  | 1.887   | 0.867               | 0.609  | 3.299   |
| T0982   | T0982-D2   | TBM-hard | 0.301             | 0.184  | 14.183  | 0.590               | 0.309  | 7.122   |
| T0983   | T0983-D1   | TBM-easy | 0.947             | 0.714  | 1.591   | 0.946               | 0.724  | 1.615   |
| T0984   | T0984-D1   | TBM-easy | 0.867             | 0.393  | 4.149   | 0.875               | 0.413  | 3.798   |
| T0984   | T0984-D2   | TBM-easy | 0.775             | 0.524  | 3.713   | 0.789               | 0.550  | 3.524   |
| T0985   | T0985-D1   | TBM-hard | 0.810             | 0.306  | 7.378   | 0.810               | 0.303  | 7.473   |
| T0986s1 | T0986s1-D1 | FM/TBM   | 0.396             | 0.269  | 8.484   | 0.691               | 0.459  | 3.148   |

|                |            |          |              |              |              |              |              |              |
|----------------|------------|----------|--------------|--------------|--------------|--------------|--------------|--------------|
| T0986s2        | T0986s2-D1 | FM       | 0.230        | 0.150        | 17.058       | 0.598        | 0.279        | 6.719        |
| T0987          | T0987-D1   | FM       | 0.221        | 0.088        | 18.996       | 0.581        | 0.211        | 6.457        |
| T0987          | T0987-D2   | FM       | 0.166        | 0.073        | 20.548       | 0.440        | 0.163        | 15.237       |
| T0989          | T0989-D1   | FM       | 0.252        | 0.129        | 14.723       | 0.477        | 0.237        | 10.499       |
| T0989          | T0989-D2   | FM       | 0.234        | 0.134        | 12.956       | 0.313        | 0.172        | 13.109       |
| T0990          | T0990-D1   | FM       | 0.360        | 0.283        | 13.791       | 0.577        | 0.411        | 5.438        |
| T0990          | T0990-D2   | FM       | 0.249        | 0.123        | 8.672        | 0.371        | 0.157        | 19.744       |
| T0990          | T0990-D3   | FM       | 0.202        | 0.097        | 5.240        | 0.223        | 0.089        | 17.292       |
| T0991          | T0991-D1   | FM       | 0.214        | 0.155        | 18.137       | 0.269        | 0.180        | 15.107       |
| T0992          | T0992-D1   | FM/TBM   | 0.321        | 0.164        | 11.019       | 0.732        | 0.481        | 3.334        |
| T0993s1        | T0993s1-D1 | TBM-easy | 0.839        | 0.517        | 8.419        | 0.846        | 0.547        | 8.884        |
| T0993s2        | T0993s2-D1 | TBM-easy | 0.692        | 0.457        | 4.031        | 0.704        | 0.472        | 3.487        |
| T0995          | T0995-D1   | TBM-easy | 0.891        | 0.617        | 2.043        | 0.900        | 0.631        | 4.308        |
| T0996          | T0996-D1   | TBM-easy | 0.778        | 0.558        | 4.127        | 0.779        | 0.563        | 4.126        |
| T0996          | T0996-D2   | TBM-easy | 0.803        | 0.579        | 3.022        | 0.820        | 0.604        | 3.059        |
| T0996          | T0996-D3   | TBM-easy | 0.813        | 0.583        | 3.151        | 0.816        | 0.598        | 2.986        |
| T0996          | T0996-D4   | TBM-easy | 0.749        | 0.538        | 3.190        | 0.750        | 0.540        | 7.248        |
| T0996          | T0996-D5   | TBM-easy | 0.735        | 0.510        | 4.141        | 0.737        | 0.535        | 4.134        |
| T0996          | T0996-D6   | TBM-easy | 0.860        | 0.666        | 2.118        | 0.865        | 0.651        | 1.935        |
| T0997          | T0997-D1   | FM/TBM   | 0.565        | 0.332        | 5.957        | 0.612        | 0.350        | 6.788        |
| T0998          | T0998-D1   | FM       | 0.228        | 0.108        | 21.221       | 0.199        | 0.087        | 18.877       |
| T0999          | T0999-D1   | TBM-easy | 0.980        | 0.762        | 1.086        | 0.986        | 0.833        | 0.927        |
| T0999          | T0999-D2   | TBM-hard | 0.761        | 0.323        | 5.037        | 0.769        | 0.326        | 5.694        |
| T0999          | T0999-D3   | TBM-easy | 0.787        | 0.496        | 3.868        | 0.792        | 0.493        | 3.684        |
| T0999          | T0999-D4   | TBM-easy | 0.971        | 0.744        | 1.044        | 0.964        | 0.757        | 1.320        |
| T0999          | T0999-D5   | TBM-easy | 0.893        | 0.513        | 2.391        | 0.890        | 0.522        | 2.501        |
| T1000          | T1000-D1   | TBM-easy | 0.929        | 0.810        | 1.136        | 0.948        | 0.886        | 1.097        |
| T1000          | T1000-D2   | FM       | 0.183        | 0.062        | 24.872       | 0.851        | 0.426        | 4.249        |
| T1001          | T1001-D1   | FM       | 0.292        | 0.171        | 13.017       | 0.614        | 0.331        | 4.201        |
| T1002          | T1002-D1   | TBM-easy | 0.785        | 0.653        | 1.797        | 0.782        | 0.636        | 1.764        |
| T1002          | T1002-D2   | TBM-easy | 0.807        | 0.682        | 1.995        | 0.802        | 0.670        | 2.189        |
| T1002          | T1002-D3   | TBM-easy | 0.781        | 0.616        | 3.214        | 0.777        | 0.602        | 7.012        |
| T1003          | T1003-D1   | TBM-easy | 0.933        | 0.726        | 7.691        | 0.936        | 0.746        | 7.695        |
| T1004          | T1004-D1   | TBM-easy | 0.759        | 0.581        | 2.934        | 0.793        | 0.616        | 2.606        |
| T1004          | T1004-D2   | TBM-easy | 0.631        | 0.435        | 2.900        | 0.673        | 0.464        | 2.701        |
| T1004          | T1004-D3   | TBM-easy | 0.905        | 0.715        | 2.104        | 0.926        | 0.832        | 3.570        |
| T1005          | T1005-D1   | FM/TBM   | 0.669        | 0.301        | 6.110        | 0.699        | 0.313        | 7.741        |
| T1006          | T1006-D1   | TBM-easy | 0.946        | 0.828        | 0.773        | 0.957        | 0.844        | 0.679        |
| T1008          | T1008-D1   | FM/TBM   | 0.348        | 0.244        | 9.066        | 0.353        | 0.253        | 9.156        |
| T1009          | T1009-D1   | TBM-hard | 0.854        | 0.377        | 5.641        | 0.875        | 0.437        | 5.081        |
| T1010          | T1010-D1   | FM       | 0.181        | 0.050        | 17.840       | 0.513        | 0.168        | 8.362        |
| T1011          | T1011-D1   | TBM-hard | 0.805        | 0.414        | 4.460        | 0.794        | 0.387        | 4.748        |
| T1011          | T1011-D2   | TBM-easy | 0.843        | 0.641        | 2.220        | 0.874        | 0.709        | 1.924        |
| T1013          | T1013-D1   | TBM-easy | 0.923        | 0.626        | 3.238        | 0.929        | 0.633        | 2.360        |
| T1014          | T1014-D1   | TBM-easy | 0.883        | 0.626        | 2.550        | 0.897        | 0.646        | 3.351        |
| T1014          | T1014-D2   | TBM-easy | 0.803        | 0.577        | 2.944        | 0.800        | 0.556        | 2.960        |
| T1015s1        | T1015s1-D1 | FM       | 0.367        | 0.267        | 10.472       | 0.524        | 0.372        | 5.880        |
| T1015s2        | T1015s2-D1 | TBM-hard | 0.705        | 0.457        | 4.317        | 0.713        | 0.469        | 4.293        |
| T1016          | T1016-D1   | TBM-easy | 0.879        | 0.589        | 3.724        | 0.881        | 0.597        | 3.683        |
| T1017s1        | T1017s1-D1 | TBM-easy | 0.749        | 0.541        | 3.317        | 0.770        | 0.552        | 2.895        |
| T1017s2        | T1017s2-D1 | FM       | 0.443        | 0.248        | 8.733        | 0.768        | 0.466        | 3.353        |
| T1018          | T1018-D1   | TBM-easy | 0.937        | 0.595        | 1.910        | 0.938        | 0.604        | 1.907        |
| T1019s1        | T1019s1-D1 | FM/TBM   | 0.407        | 0.341        | 8.196        | 0.597        | 0.491        | 2.491        |
| T1019s2        | T1019s2-D1 | TBM-easy | 0.579        | 0.415        | 11.392       | 0.705        | 0.494        | 3.515        |
| T1020          | T1020-D1   | TBM-easy | 0.880        | 0.480        | 2.946        | 0.879        | 0.463        | 3.012        |
| T1021s1        | T1021s1-D1 | TBM-hard | 0.795        | 0.513        | 3.538        | 0.827        | 0.549        | 3.331        |
| T1021s2        | T1021s2-D1 | TBM-hard | 0.846        | 0.405        | 3.462        | 0.799        | 0.419        | 15.149       |
| T1021s3        | T1021s3-D1 | FM       | 0.249        | 0.121        | 18.187       | 0.636        | 0.313        | 7.216        |
| T1021s3        | T1021s3-D2 | FM       | 0.288        | 0.196        | 10.234       | 0.452        | 0.286        | 6.838        |
| T1022s1        | T1022s1-D1 | FM       | 0.196        | 0.096        | 20.711       | 0.555        | 0.297        | 10.751       |
| T1022s1        | T1022s1-D2 | TBM-hard | 0.307        | 0.261        | 11.733       | 0.632        | 0.511        | 6.524        |
| T1022s2        | T1022s2-D1 | TBM-hard | 0.104        | 0.051        | 16.187       | 0.769        | 0.317        | 7.390        |
| <b>Average</b> |            |          | <b>0.577</b> | <b>0.386</b> | <b>8.241</b> | <b>0.673</b> | <b>0.442</b> | <b>6.002</b> |

**Table S3.** Template information for all 121 CASP13 targets. The “Target” column is the name of each target. The “Server group deadline” is the Server group submission deadline for each target. The “Domain” is the domain information for each target. The “Type” is the category each target falls into. The “TM-score” is the TM-score of the first model built by “Zhang-server”. The “TM-align template” columns include the best template identified by TM-align, the TM-score of the best template, and the PDB release date of the best template. The “LOMETS template” columns include the first template identified by LOMETS and the TM-score of the first template.

| Target  | Server group deadline | Domain     | Type     | TM-score (Zhang-server first model) | TM-align template |          |                   | LOMETS template |          |
|---------|-----------------------|------------|----------|-------------------------------------|-------------------|----------|-------------------|-----------------|----------|
|         |                       |            |          |                                     | Best template     | TM-score | PDB Released date | First template  | TM-score |
| T0949   | 5/4/2018              | T0949-D1   | FM/TBM   | 0.665                               | 3gyrL             | 0.714    | 4/28/2009         | 3cg8B           | 0.552    |
| T0950   | 5/5/2018              | T0950-D1   | FM       | 0.441                               | 5j65A             | 0.566    | 5/25/2016         | 1qoyA           | 0.285    |
| T0951   | 5/9/2018              | T0951-D1   | TBM-easy | 0.972                               | 5cbkA             | 0.970    | 10/21/2015        | 5cbkA           | 0.970    |
| T0953s1 | 5/10/2018             | T0953s1-D1 | FM       | 0.397                               | 4uxeA             | 0.710    | 8/19/2015         | 4ld1A           | 0.364    |
| T0953s2 | 5/10/2018             | T0953s2-D1 | FM/TBM   | 0.358                               | 2f96A             | 0.589    | 2/14/2006         | 2ic7A           | 0.146    |
| T0953s2 | 5/10/2018             | T0953s2-D2 | FM       | 0.590                               | 1jtaA             | 0.686    | 6/19/2002         | 2ic7A           | 0.210    |
| T0953s2 | 5/10/2018             | T0953s2-D3 | FM       | 0.310                               | 2i3oD             | 0.596    | 8/29/2006         | 2ic7A           | 0.150    |
| T0954   | 5/13/2018             | T0954-D1   | TBM-hard | 0.810                               | 5e6rA             | 0.814    | 3/2/2016          | 2h9lA           | 0.654    |
| T0955   | 5/14/2018             | T0955-D1   | FM/TBM   | 0.755                               | 3b35A             | 0.711    | 11/27/2007        | 4at7B           | 0.657    |
| T0957s1 | 5/15/2018             | T0957s1-D1 | FM       | 0.380                               | 5sy5B             | 0.512    | 11/9/2016         | 4ifdD           | 0.229    |
| T0957s1 | 5/15/2018             | T0957s1-D2 | TBM-hard | 0.495                               | 4l5gA             | 0.764    | 7/31/2013         | 4ifdD           | 0.234    |
| T0957s2 | 5/15/2018             | T0957s2-D1 | FM       | 0.532                               | 4f52E             | 0.682    | 9/19/2012         | 3qkyA           | 0.348    |
| T0958   | 5/15/2018             | T0958-D1   | FM/TBM   | 0.547                               | 4v0pA             | 0.626    | 10/1/2014         | 3duwA           | 0.412    |
| T0959   | 5/15/2018             | T0959-D1   | TBM-hard | 0.725                               | 4oltA             | 0.647    | 4/30/2014         | 2nr7A           | 0.569    |
| T0960   | 5/16/2018             | T0960-D1   | FM       | 0.166                               | 1w18B             | 0.451    | 5/11/2005         | 5hqqA           | 0.191    |
| T0960   | 5/16/2018             | T0960-D2   | FM       | 0.392                               | 5m9fA             | 0.708    | 12/20/2017        | 1uynX           | 0.284    |
| T0960   | 5/16/2018             | T0960-D3   | TBM-hard | 0.765                               | 5efvA             | 0.764    | 5/25/2016         | 5efvA           | 0.693    |
| T0960   | 5/16/2018             | T0960-D4   | FM       | 0.230                               | 3tj1A             | 0.504    | 9/28/2011         | 1oa8D           | 0.146    |
| T0960   | 5/16/2018             | T0960-D5   | TBM-easy | 0.713                               | 4mtmA             | 0.723    | 10/1/2014         | 4mtmA           | 0.666    |
| T0961   | 5/24/2018             | T0961-D1   | TBM-easy | 0.960                               | 4y9jA             | 0.958    | 6/3/2015          | 4y9jA           | 0.952    |
| T0962   | 5/24/2018             | T0962-D1   | TBM-easy | 0.866                               | 4ok7A             | 0.860    | 3/19/2014         | 4ok7A           | 0.835    |
| T0963   | 5/18/2018             | T0963-D1   | FM       | 0.151                               | 1w18B             | 0.471    | 5/11/2005         | 4unmA           | 0.152    |
| T0963   | 5/18/2018             | T0963-D2   | FM       | 0.481                               | 5m9fA             | 0.692    | 12/20/2017        | 2qomB           | 0.243    |
| T0963   | 5/18/2018             | T0963-D3   | TBM-hard | 0.756                               | 5efvA             | 0.780    | 5/25/2016         | 5efvA           | 0.679    |
| T0963   | 5/18/2018             | T0963-D4   | FM       | 0.239                               | 3tj1A             | 0.507    | 9/28/2011         | 4unmA           | 0.137    |
| T0963   | 5/18/2018             | T0963-D5   | TBM-easy | 0.784                               | 4mtmA             | 0.807    | 10/1/2014         | 4mtmA           | 0.762    |
| T0964   | 5/19/2018             | T0964-D1   | TBM-hard | 0.687                               | 5t7aA             | 0.762    | 8/23/2017         | 5t7aA           | 0.724    |
| T0965   | 5/19/2018             | T0965-D1   | TBM-hard | 0.828                               | 1orrA             | 0.831    | 8/26/2003         | 2p5uA           | 0.769    |
| T0966   | 5/20/2018             | T0966-D1   | TBM-hard | 0.839                               | 2ebfX             | 0.841    | 3/6/2007          | 2ebfX           | 0.779    |
| T0967   | 5/20/2018             | T0967-D1   | TBM-easy | 0.834                               | 3jlzP             | 0.819    | 10/10/2012        | 5ho1A           | 0.809    |
| T0968s1 | 5/21/2018             | T0968s1-D1 | FM       | 0.556                               | 3ujhA             | 0.518    | 11/16/2011        | 1xksA           | 0.368    |
| T0968s2 | 5/21/2018             | T0968s2-D1 | FM       | 0.621                               | 3ty1A             | 0.553    | 12/28/2011        | 4ygtA           | 0.310    |
| T0969   | 5/25/2018             | T0969-D1   | FM       | 0.729                               | 4k3uA             | 0.489    | 9/3/2014          | 1escA           | 0.407    |
| T0970   | 5/26/2018             | T0970-D1   | FM/TBM   | 0.583                               | 1wplK             | 0.648    | 9/28/2004         | 1vx7W           | 0.317    |
| T0971   | 5/26/2018             | T0971-D1   | TBM-easy | 0.921                               | 3ebtA             | 0.934    | 9/30/2008         | 3ebtA           | 0.917    |
| T0973   | 5/27/2018             | T0973-D1   | TBM-easy | 0.618                               | 1qbeB             | 0.855    | 7/11/1996         | 3rz3A           | 0.179    |
| T0974s1 | 5/28/2018             | T0974s1-D1 | TBM-easy | 0.716                               | 3vk0A             | 0.748    | 3/14/2012         | 3bs3A           | 0.621    |
| T0974s2 | 5/28/2018             | T0974s2-D1 | TBM-easy | 0.897                               | 3zhiA             | 0.867    | 12/25/2013        | 3zhiA           | 0.868    |
| T0975   | 6/1/2018              | T0975-D1   | FM       | 0.669                               | 3u44B             | 0.542    | 3/21/2012         | 3l0aA           | 0.418    |
| T0976   | 6/1/2018              | T0976-D1   | TBM-easy | 0.832                               | 2hhgA             | 0.845    | 7/25/2006         | 1yt8A           | 0.716    |
| T0976   | 6/1/2018              | T0976-D2   | TBM-easy | 0.828                               | 2hhgA             | 0.825    | 7/25/2006         | 1yt8A           | 0.787    |
| T0977   | 6/2/2018              | T0977-D1   | TBM-easy | 0.900                               | 5efvA             | 0.881    | 5/25/2016         | 5efvA           | 0.843    |
| T0977   | 6/2/2018              | T0977-D2   | TBM-easy | 0.759                               | 5efvA             | 0.830    | 5/25/2016         | 5efvA           | 0.789    |
| T0978   | 6/3/2018              | T0978-D1   | FM/TBM   | 0.527                               | 1q2rA             | 0.643    | 9/9/2003          | 1enuA           | 0.414    |
| T0979   | 6/3/2018              | T0979-D1   | TBM-hard | 0.441                               | 5apzA             | 0.770    | 1/27/2016         | 3na7A           | 0.390    |
| T0980s1 | 6/4/2018              | T0980s1-D1 | FM       | 0.290                               | 4kmaA             | 0.524    | 11/20/2013        | 2v64A           | 0.255    |
| T0980s2 | 6/4/2018              | T0980s2-D1 | FM       | 0.153                               | 3gedB             | 0.477    | 3/17/2009         | 3evzA           | 0.166    |
| T0981   | 6/7/2018              | T0981-D1   | TBM-hard | 0.629                               | 5efvA             | 0.696    | 5/25/2016         | 3bs0A           | 0.392    |
| T0981   | 6/7/2018              | T0981-D2   | FM       | 0.262                               | 5efvA             | 0.686    | 5/25/2016         | 2oajA           | 0.234    |
| T0981   | 6/7/2018              | T0981-D3   | FM/TBM   | 0.677                               | 3seeA             | 0.644    | 8/3/2011          | 5e7tB           | 0.458    |
| T0981   | 6/7/2018              | T0981-D4   | TBM-hard | 0.591                               | 5m9fA             | 0.647    | 12/20/2017        | 5m9fA           | 0.557    |
| T0981   | 6/7/2018              | T0981-D5   | TBM-hard | 0.659                               | 5m9fA             | 0.741    | 12/20/2017        | 5m9fA           | 0.600    |
| T0982   | 6/8/2018              | T0982-D1   | TBM-easy | 0.888                               | 2luzA             | 0.849    | 10/3/2012         | 3q63A           | 0.800    |
| T0982   | 6/8/2018              | T0982-D2   | TBM-hard | 0.626                               | 2rezA             | 0.751    | 4/22/2008         | 4xrtA           | 0.457    |



|                |           |            |          |              |       |              |            |       |              |
|----------------|-----------|------------|----------|--------------|-------|--------------|------------|-------|--------------|
| T0983          | 6/8/2018  | T0983-D1   | TBM-easy | 0.947        | 3pfgA | 0.945        | 12/15/2010 | 3pfgA | 0.936        |
| T0984          | 6/9/2018  | T0984-D1   | TBM-easy | 0.874        | 6c96A | 0.873        | 4/4/2018   | 6c96A | 0.847        |
| T0984          | 6/9/2018  | T0984-D2   | TBM-easy | 0.782        | 5e1jA | 0.815        | 12/16/2015 | 6c96A | 0.757        |
| T0985          | 6/10/2018 | T0985-D1   | TBM-hard | 0.854        | 2cqtA | 0.836        | 5/16/2006  | 2cqtA | 0.771        |
| T0986s1        | 6/11/2018 | T0986s1-D1 | FM/TBM   | 0.648        | 1v74A | 0.652        | 3/30/2004  | 5ts4A | 0.280        |
| T0986s2        | 6/11/2018 | T0986s2-D1 | FM       | 0.594        | 4wj3B | 0.592        | 12/31/2014 | 1iruW | 0.269        |
| T0987          | 6/14/2018 | T0987-D1   | FM       | 0.620        | 3htlX | 0.580        | 9/15/2009  | 4ypjA | 0.316        |
| T0987          | 6/14/2018 | T0987-D2   | FM       | 0.378        | 3uxfA | 0.574        | 11/28/2012 | 2y7lA | 0.309        |
| T0989          | 6/15/2018 | T0989-D1   | FM       | 0.547        | 5efvA | 0.590        | 5/25/2016  | 2ra5A | 0.301        |
| T0989          | 6/15/2018 | T0989-D2   | FM       | 0.342        | 5m9fA | 0.591        | 12/20/2017 | 2wjqA | 0.232        |
| T0990          | 6/16/2018 | T0990-D1   | FM       | 0.567        | 1ciiA | 0.592        | 1/14/1998  | 5ctqA | 0.340        |
| T0990          | 6/16/2018 | T0990-D2   | FM       | 0.382        | 3s27A | 0.483        | 8/24/2011  | 1tjfb | 0.207        |
| T0990          | 6/16/2018 | T0990-D3   | FM       | 0.212        | 1o0sA | 0.449        | 7/22/2003  | 5ijnD | 0.207        |
| T0991          | 6/17/2018 | T0991-D1   | FM       | 0.223        | 5jzrA | 0.672        | 8/10/2016  | 2m47A | 0.212        |
| T0992          | 6/17/2018 | T0992-D1   | FM/TBM   | 0.722        | 3uc2A | 0.710        | 11/23/2011 | 4bffA | 0.523        |
| T0993s1        | 6/18/2018 | T0993s1-D1 | TBM-easy | 0.843        | 4u00A | 0.811        | 5/13/2015  | 3dhwc | 0.770        |
| T0993s2        | 6/18/2018 | T0993s2-D1 | TBM-easy | 0.704        | 1tilD | 0.767        | 6/15/2004  | 1vc1A | 0.685        |
| T0995          | 6/22/2018 | T0995-D1   | TBM-easy | 0.904        | 3wuyA | 0.892        | 12/31/2014 | 3wuyA | 0.881        |
| T0996          | 6/23/2018 | T0996-D1   | TBM-easy | 0.778        | 5uvnA | 0.774        | 4/12/2017  | 5uvnA | 0.764        |
| T0996          | 6/23/2018 | T0996-D2   | TBM-easy | 0.815        | 5uvnA | 0.820        | 4/12/2017  | 5uvnA | 0.817        |
| T0996          | 6/23/2018 | T0996-D3   | TBM-easy | 0.823        | 5uvnA | 0.808        | 4/12/2017  | 5uvnA | 0.805        |
| T0996          | 6/23/2018 | T0996-D4   | TBM-easy | 0.750        | 5uvnA | 0.797        | 4/12/2017  | 5uvnA | 0.717        |
| T0996          | 6/23/2018 | T0996-D5   | TBM-easy | 0.7380       | 5uvnA | 0.747        | 4/12/2017  | 5uvnA | 0.728        |
| T0996          | 6/23/2018 | T0996-D6   | TBM-easy | 0.879        | 5uvnA | 0.846        | 4/12/2017  | 5uvnA | 0.820        |
| T0997          | 6/24/2018 | T0997-D1   | FM/TBM   | 0.613        | 4xzzA | 0.618        | 9/2/2015   | 4xzzA | 0.503        |
| T0998          | 6/24/2018 | T0998-D1   | FM       | 0.206        | 2vf9A | 0.536        | 9/23/2008  | 2vqiA | 0.159        |
| T0999          | 6/25/2018 | T0999-D1   | TBM-easy | 0.986        | 1nr5A | 0.986        | 3/18/2003  | 1nr5A | 0.983        |
| T0999          | 6/25/2018 | T0999-D2   | TBM-hard | 0.795        | 5xwbA | 0.871        | 9/6/2017   | 1x8rA | 0.726        |
| T0999          | 6/25/2018 | T0999-D3   | TBM-easy | 0.793        | 4y0aA | 0.789        | 8/12/2015  | 4y0aA | 0.724        |
| T0999          | 6/25/2018 | T0999-D4   | TBM-easy | 0.964        | 5swuA | 0.963        | 9/7/2016   | 5swvC | 0.955        |
| T0999          | 6/25/2018 | T0999-D5   | TBM-easy | 0.888        | 5swvC | 0.870        | 12/21/2016 | 5swvC | 0.860        |
| T1000          | 6/28/2018 | T1000-D1   | TBM-easy | 0.945        | 3lazA | 0.935        | 1/19/2010  | 3lazA | 0.922        |
| T1000          | 6/28/2018 | T1000-D2   | FM       | 0.814        | 3lq2A | 0.438        | 3/2/2010   | 1jqkA | 0.230        |
| T1001          | 6/29/2018 | T1001-D1   | FM       | 0.631        | 4rpwA | 0.690        | 5/11/2016  | 5akpA | 0.533        |
| T1002          | 6/29/2018 | T1002-D1   | TBM-easy | 0.794        | 4krtA | 0.900        | 4/2/2014   | 3npfA | 0.686        |
| T1002          | 6/29/2018 | T1002-D2   | TBM-easy | 0.803        | 4krtA | 0.899        | 4/2/2014   | 3npfA | 0.741        |
| T1002          | 6/29/2018 | T1002-D3   | TBM-easy | 0.792        | 4xxtA | 0.790        | 2/18/2015  | 4xxtA | 0.728        |
| T1003          | 6/30/2018 | T1003-D1   | TBM-easy | 0.934        | 5txrB | 0.922        | 3/28/2018  | 5txrB | 0.908        |
| T1004          | 7/1/2018  | T1004-D1   | TBM-easy | 0.775        | 5efvA | 0.818        | 5/25/2016  | 5efvA | 0.748        |
| T1004          | 7/1/2018  | T1004-D2   | TBM-easy | 0.705        | 6cl6A | 0.805        | 6/27/2018  | 5efvA | 0.574        |
| T1004          | 7/1/2018  | T1004-D3   | TBM-easy | 0.925        | 5m9fA | 0.911        | 12/20/2017 | 5m9fA | 0.909        |
| T1005          | 7/2/2018  | T1005-D1   | FM/TBM   | 0.697        | 4nuyA | 0.694        | 4/9/2014   | 4nuyA | 0.570        |
| T1006          | 7/5/2018  | T1006-D1   | TBM-easy | 0.954        | 3w5xA | 0.959        | 4/16/2014  | 3w5xA | 0.937        |
| T1008          | 7/6/2018  | T1008-D1   | FM/TBM   | 0.362        | 1ry6A | 0.704        | 4/13/2004  | 4proC | 0.246        |
| T1009          | 7/6/2018  | T1009-D1   | TBM-hard | 0.876        | 2x2hA | 0.842        | 1/19/2011  | 2xvgA | 0.809        |
| T1010          | 7/8/2018  | T1010-D1   | FM       | 0.561        | 1i78A | 0.538        | 10/3/2001  | 1ekmA | 0.158        |
| T1011          | 7/9/2018  | T1011-D1   | TBM-hard | 0.806        | 4zwjA | 0.841        | 7/29/2015  | 4n6hA | 0.749        |
| T1011          | 7/9/2018  | T1011-D2   | TBM-easy | 0.866        | 4k5yA | 0.988        | 7/17/2013  | 5x33A | 0.963        |
| T1013          | 7/12/2018 | T1013-D1   | TBM-easy | 0.927        | 4n6hA | 0.919        | 12/25/2013 | 4n6hA | 0.916        |
| T1014          | 7/12/2018 | T1014-D1   | TBM-easy | 0.889        | 3dgeA | 0.894        | 7/7/2009   | 3dgeA | 0.859        |
| T1014          | 7/12/2018 | T1014-D2   | TBM-easy | 0.805        | 1a2oA | 0.806        | 4/29/1998  | 1m5tA | 0.724        |
| T1015s1        | 7/13/2018 | T1015s1-D1 | FM       | 0.466        | 1dp4C | 0.518        | 7/12/2000  | 3v9fA | 0.252        |
| T1015s2        | 7/13/2018 | T1015s2-D1 | TBM-hard | 0.716        | 4g6vA | 0.717        | 12/12/2012 | 4g6vA | 0.616        |
| T1016          | 7/13/2018 | T1016-D1   | TBM-easy | 0.880        | 4embA | 0.874        | 4/25/2012  | 4ij5A | 0.864        |
| T1017s1        | 7/14/2018 | T1017s1-D1 | TBM-easy | 0.764        | 2o5hA | 0.777        | 1/9/2007   | 2o5hA | 0.684        |
| T1017s2        | 7/14/2018 | T1017s2-D1 | FM       | 0.697        | 2zzgA | 0.504        | 7/21/2009  | 2gzaC | 0.361        |
| T1018          | 7/14/2018 | T1018-D1   | TBM-easy | 0.940        | 3iarA | 0.926        | 8/11/2009  | 3rysA | 0.894        |
| T1019s1        | 7/15/2018 | T1019s1-D1 | FM/TBM   | 0.596        | 4uzjA | 0.500        | 2/25/2015  | 5tdwA | 0.272        |
| T1019s2        | 7/15/2018 | T1019s2-D1 | TBM-easy | 0.773        | 1v74A | 0.660        | 3/30/2004  | 1v74A | 0.597        |
| T1020          | 7/15/2018 | T1020-D1   | TBM-easy | 0.879        | 3m71A | 0.843        | 5/12/2010  | 3m71A | 0.835        |
| T1021s1        | 7/16/2018 | T1021s1-D1 | TBM-hard | 0.822        | 5iv5W | 0.796        | 5/18/2016  | 5w5fA | 0.755        |
| T1021s2        | 7/16/2018 | T1021s2-D1 | TBM-hard | 0.797        | 3j9qA | 0.851        | 4/1/2015   | 3j9qA | 0.792        |
| T1021s3        | 7/16/2018 | T1021s3-D1 | FM       | 0.633        | 2givA | 0.581        | 4/11/2006  | 4hudA | 0.408        |
| T1021s3        | 7/16/2018 | T1021s3-D2 | FM       | 0.436        | 3ievA | 0.604        | 8/25/2009  | 3kzfA | 0.241        |
| T1022s1        | 7/19/2018 | T1022s1-D1 | FM       | 0.694        | 5iv5U | 0.703        | 5/18/2016  | 5iv5U | 0.566        |
| T1022s1        | 7/19/2018 | T1022s1-D2 | TBM-hard | 0.626        | 5jceA | 0.666        | 6/8/2016   | 2l9yA | 0.520        |
| T1022s2        | 7/19/2018 | T1022s2-D1 | TBM-hard | 0.772        | 4mtkA | 0.830        | 10/1/2014  | 4mtkA | 0.727        |
| <b>Average</b> |           |            |          | <b>0.674</b> |       | <b>0.732</b> |            |       | <b>0.567</b> |

**Table S4.** Contact prediction results for NeBcon and its component contact prediction methods for the 50 FM targets.

| method                | short range contacts |         |       | medium range contacts |         |       | long range contacts |         |       |
|-----------------------|----------------------|---------|-------|-----------------------|---------|-------|---------------------|---------|-------|
|                       | top L/5              | top L/2 | top L | top L/5               | top L/2 | top L | top L/5             | top L/2 | top L |
| FreeContact           | 0.189                | 0.140   | 0.118 | 0.193                 | 0.138   | 0.105 | 0.220               | 0.163   | 0.120 |
| GREMLIN               | 0.234                | 0.163   | 0.110 | 0.222                 | 0.152   | 0.101 | 0.265               | 0.198   | 0.145 |
| CCMpred               | 0.247                | 0.163   | 0.110 | 0.228                 | 0.152   | 0.102 | 0.269               | 0.196   | 0.146 |
| MetaPSICOV2           | 0.492                | 0.371   | 0.253 | 0.472                 | 0.355   | 0.254 | 0.352               | 0.283   | 0.222 |
| DeepCOV*              | 0.529                | 0.386   | 0.258 | 0.519                 | 0.396   | 0.276 | 0.447               | 0.353   | 0.272 |
| DNCON2*               | 0.508                | 0.380   | 0.258 | 0.520                 | 0.392   | 0.280 | 0.458               | 0.360   | 0.277 |
| Deepcontact*          | 0.496                | 0.371   | 0.258 | 0.545                 | 0.426   | 0.301 | 0.447               | 0.361   | 0.284 |
| DeepPLM* <sup>+</sup> | 0.571                | 0.415   | 0.274 | 0.595                 | 0.450   | 0.308 | 0.520               | 0.421   | 0.326 |
| ResPRE* <sup>++</sup> | 0.590                | 0.431   | 0.286 | 0.621                 | 0.457   | 0.314 | 0.530               | 0.431   | 0.342 |
| NeBcon                | 0.607                | 0.439   | 0.293 | 0.643                 | 0.470   | 0.319 | 0.534               | 0.453   | 0.357 |

\* Indicates the approach uses a deep-learning framework.

+ Indicates the approach is one of our in-house methods.

**Table S5.** Comparison between the contact prediction results for NeBcon with HHblits MSAs as input or DeepMSA MSAs as input for the 50 FM targets. Single-tailed Student's t-test is used here to evaluate the statistical significance.

| range        | contacts  | NeBcon based on HHblits MSAs | NeBcon based on DeepMSA MSAs | p-value  |
|--------------|-----------|------------------------------|------------------------------|----------|
| short range  | top $L/5$ | 0.541                        | 0.607                        | 5.73E-04 |
|              | top $L/2$ | 0.391                        | 0.439                        | 5.43E-04 |
|              | top $L$   | 0.268                        | 0.293                        | 8.17E-04 |
| medium range | top $L/5$ | 0.540                        | 0.643                        | 1.20E-04 |
|              | top $L/2$ | 0.405                        | 0.470                        | 3.13E-04 |
|              | top $L$   | 0.294                        | 0.319                        | 1.13E-02 |
| long range   | top $L/5$ | 0.474                        | 0.534                        | 1.86E-02 |
|              | top $L/2$ | 0.393                        | 0.453                        | 7.68E-03 |
|              | top $L$   | 0.302                        | 0.357                        | 1.48E-03 |

**Table S6.** The DeepMSA, contact prediction and structure modeling information for the 50 FM targets. The “Domain” is the domain name of each target. The “Class” is the fold class of each protein. The “ $N_{msa}$ ” is the number of sequences in the MSA. The “ $N_{eff}$ ” is the  $N_{eff}$  value of the deep MSA for each target. The “Precision” is the precision of the top L long-range contact prediction by NeBcon. The “TM-score” is the TM-score of the best model from “Zhang-Server” or “QUARK” corresponding to the information from the “Model” column.

| Domain         | Class         | $N_{msa}$     | $N_{eff}$     | Precision    | TM-score     | Model               |
|----------------|---------------|---------------|---------------|--------------|--------------|---------------------|
| T0949-D1       | $\beta$       | 5760          | 245.757       | 0.892        | 0.689        | QUARK model4        |
| T0950-D1       | $\alpha$      | 304           | 10.012        | 0.509        | 0.506        | QUARK model2        |
| T0953s1-D1     | $\beta$       | 548           | 16.987        | 0.000        | 0.433        | Zhang-Server model4 |
| T0953s2-D1     | $\alpha$      | 1093          | 43.132        | 0.250        | 0.464        | QUARK model2        |
| T0953s2-D2     | $\alpha\beta$ | 1093          | 43.132        | 0.819        | 0.590        | Zhang-Server model1 |
| T0953s2-D3     | $\alpha\beta$ | 1093          | 43.132        | 0.753        | 0.310        | Zhang-Server model1 |
| T0955-D1       | $\alpha\beta$ | 1             | 0.156         | 0.098        | 0.824        | QUARK model2        |
| T0957s1-D1     | $\alpha\beta$ | 109           | 5.436         | 0.287        | 0.462        | QUARK model5        |
| T0957s2-D1     | $\alpha$      | 84            | 4.529         | 0.303        | 0.635        | QUARK model4        |
| T0958-D1       | $\alpha\beta$ | 58            | 2.567         | 0.416        | 0.548        | QUARK model1        |
| T0960-D1       | $\alpha\beta$ | 118           | 3.957         | 0.000        | 0.188        | QUARK model2        |
| T0960-D2       | $\beta$       | 118           | 3.957         | 0.048        | 0.454        | Zhang-Server model2 |
| T0960-D4       | $\alpha$      | 118           | 3.957         | 0.000        | 0.256        | QUARK model2        |
| T0963-D1       | $\alpha\beta$ | 276           | 14.572        | 0.000        | 0.189        | Zhang-Server model3 |
| T0963-D2       | $\beta$       | 276           | 14.572        | 0.037        | 0.481        | Zhang-Server model1 |
| T0963-D4       | $\alpha$      | 3208          | 155.175       | 0.000        | 0.250        | QUARK model1        |
| T0968s1-D1     | $\alpha\beta$ | 256           | 15.588        | 0.288        | 0.566        | Zhang-Server model2 |
| T0968s2-D1     | $\beta$       | 510           | 33.033        | 0.252        | 0.647        | QUARK model1        |
| T0969-D1       | $\alpha\beta$ | 7589          | 74.493        | 0.661        | 0.752        | QUARK model1        |
| T0970-D1       | $\alpha\beta$ | 673           | 12.928        | 0.518        | 0.583        | Zhang-Server model1 |
| T0975-D1       | $\alpha\beta$ | 14749         | 357.906       | 0.545        | 0.751        | Zhang-Server model5 |
| T0978-D1       | $\alpha\beta$ | 10073         | 182.546       | 0.489        | 0.661        | Zhang-Server model3 |
| T0980s1-D1     | $\alpha\beta$ | 172           | 7.429         | 0.308        | 0.540        | QUARK model1        |
| T0980s2-D1     | $\alpha\beta$ | 126           | 4.670         | 0.000        | 0.206        | Zhang-Server model4 |
| T0981-D2       | $\alpha\beta$ | 9             | 0.198         | 0.063        | 0.302        | Zhang-Server model2 |
| T0981-D3       | $\alpha\beta$ | 9             | 0.198         | 0.163        | 0.677        | Zhang-Server model1 |
| T0986s1-D1     | $\alpha\beta$ | 862           | 51.067        | 0.359        | 0.692        | QUARK model2        |
| T0986s2-D1     | $\alpha\beta$ | 94            | 5.684         | 0.568        | 0.598        | QUARK model1        |
| T0987-D1       | $\alpha\beta$ | 122           | 2.404         | 0.687        | 0.620        | Zhang-Server model1 |
| T0987-D2       | $\alpha\beta$ | 122           | 2.404         | 0.500        | 0.543        | Zhang-Server model2 |
| T0989-D1       | $\alpha\beta$ | 20            | 1.275         | 0.291        | 0.547        | Zhang-Server model1 |
| T0989-D2       | $\beta$       | 20            | 1.275         | 0.098        | 0.371        | Zhang-Server model4 |
| T0990-D1       | $\alpha$      | 68            | 1.496         | 0.342        | 0.653        | QUARK model4        |
| T0990-D2       | $\alpha\beta$ | 68            | 1.496         | 0.234        | 0.382        | Zhang-Server model1 |
| T0990-D3       | $\alpha\beta$ | 68            | 1.496         | 0.216        | 0.294        | Zhang-Server model2 |
| T0991-D1       | $\alpha\beta$ | 3             | 0.276         | 0.126        | 0.279        | Zhang-Server model2 |
| T0992-D1       | $\beta$       | 3506          | 165.324       | 0.701        | 0.746        | QUARK model5        |
| T0997-D1       | $\alpha\beta$ | 6683          | 155.400       | 0.730        | 0.695        | Zhang-Server model4 |
| T0998-D1       | $\alpha\beta$ | 10            | 0.699         | 0.102        | 0.274        | Zhang-Server model5 |
| T1000-D2       | $\alpha\beta$ | 7302          | 169.641       | 0.829        | 0.851        | QUARK model1        |
| T1001-D1       | $\alpha\beta$ | 24            | 2.028         | 0.201        | 0.631        | Zhang-Server model1 |
| T1005-D1       | $\alpha\beta$ | 10926         | 247.590       | 0.718        | 0.706        | QUARK model5        |
| T1008-D1       | $\alpha\beta$ | 1             | 0.112         | 0.429        | 0.659        | QUARK model3        |
| T1010-D1       | $\beta$       | 421           | 21.083        | 0.538        | 0.561        | Zhang-Server model1 |
| T1015s1-D1     | $\alpha\beta$ | 534           | 43.643        | 0.534        | 0.524        | QUARK model1        |
| T1017s2-D1     | $\alpha\beta$ | 366           | 14.615        | 0.280        | 0.768        | QUARK model1        |
| T1019s1-D1     | $\alpha\beta$ | 2994          | 254.684       | 0.207        | 0.597        | QUARK model1        |
| T1021s3-D1     | $\alpha\beta$ | 7592          | 334.750       | 0.729        | 0.643        | Zhang-Server model3 |
| T1021s3-D2     | $\alpha\beta$ | 68            | 4.442         | 0.083        | 0.530        | Zhang-Server model5 |
| T1022s1-D1     | $\beta$       | 6518          | 263.019       | 0.635        | 0.694        | Zhang-Server model1 |
| <b>Average</b> |               | <b>1936.3</b> | <b>60.918</b> | <b>0.357</b> | <b>0.536</b> |                     |

**Table S7.** Domain partition information for the 21 multi-domain targets. The “Target” column is the name of each target. The “CASP domain partition” columns include the number of domains and the domain boundaries given by the CASP13 assessors for each target. The “Zhang-server domain partition” columns include the number of domains and the domain boundaries predicted by ThreaDom for each target. The “NDO-score” is the normalized domain overlap (NDO) score. The “DBD-score” is the domain boundary distance (DBD) score. The “TM-score” is the TM-score of the first full-length model built by “Zhang-Server” for each multi-domain target.

| Target         | CASP domain partition |                                                 | Zhang-Server domain partition |                                                         | NDO-score    | DBD-score    | TM-score     |
|----------------|-----------------------|-------------------------------------------------|-------------------------------|---------------------------------------------------------|--------------|--------------|--------------|
|                | No.                   | boundary                                        | No.                           | boundary                                                |              |              |              |
| T0953s2        | 3                     | 2-45;46-151,229-249;152-228;                    | 1                             | 1-249;                                                  | 0.418        | 0.000        | 0.445        |
| T0957s1        | 2                     | 2-37,92-163;38-91;                              | 1                             | 1-163;                                                  | 0.629        | 0.000        | 0.303        |
| T0960          | 5                     | 11-42;43-126;127-215;216-279;280-384;           | 4                             | 1-135;136-218;219-293;294-384;                          | 0.663        | 0.281        | 0.271        |
| T0963          | 5                     | 9-39;40-121;122-214;215-278;279-372;            | 4                             | 1-135;136-215;216-280;281-372;                          | 0.776        | 0.500        | 0.242        |
| T0976          | 2                     | 9-128;129-252;                                  | 1                             | 1-252;                                                  | 0.478        | 0.000        | 0.707        |
| T0977          | 2                     | 59-359;360-563;                                 | 1                             | 1-566;                                                  | 0.516        | 0.000        | 0.624        |
| T0981          | 5                     | 34-119;120-190,394-402;191-393;403-513;514-640; | 4                             | 1-110;111-195;196-422;423-640;                          | 0.686        | 0.325        | 0.312        |
| T0982          | 2                     | 11-145;146-277;                                 | 2                             | 1-150;151-283;                                          | 0.941        | 1.000        | 0.497        |
| T0984*         | 2                     | 39-406,565-700;417-563;                         | 1                             | 1-752;                                                  | 0.658        | 0.000        | 0.861        |
| T0987          | 2                     | 11-195;196-402;                                 | 2                             | 1-215;216-405;                                          | 0.882        | 0.000        | 0.420        |
| T0989          | 2                     | 1-134;135-246;                                  | 2                             | 1-136;137-246;                                          | 1.000        | 1.000        | 0.378        |
| T0990          | 3                     | 1-76;77-134,348-520;135-347;                    | 4                             | 1-136;137-289;290-406;407-552;                          | 0.408        | 0.333        | 0.257        |
| T0996          | 6                     | 17-123;124-250;251-350;351-483;484-604;605-708; | 7                             | 12-130;131-252;253-363;364-483;484-604;605-714;715-848; | 0.794        | 0.688        | 0.360        |
| T0999          | 5                     | 15-400;401-853;866-1045;1046-1289;1290-1577;    | 4                             | 1-402;403-849;850-1050;1051-1589;                       | 0.789        | 0.406        | 0.392        |
| T1000*         | 2                     | 10-92;93-523;                                   | 2                             | 1-98;99-523;                                            | 0.936        | 0.625        | 0.680        |
| T1002*         | 3                     | 1-59;60-118;127-270;                            | 2                             | 1-150;151-270;                                          | 0.609        | 0.063        | 0.450        |
| T1004          | 3                     | 66-151;152-228;229-458;                         | 2                             | 1-247;248-458;                                          | 0.607        | 0.063        | 0.550        |
| T1011          | 2                     | 55-268,433-520;271-430;                         | 2                             | 8-270,434-519;271-433;                                  | 0.879        | 0.750        | 0.585        |
| T1014          | 2                     | 1-159;160-276;                                  | 2                             | 1-164;165-276;                                          | 1.000        | 1.000        | 0.529        |
| T1021s3        | 2                     | 4-181;195-295;                                  | 2                             | 1-181;182-295;                                          | 0.989        | 1.000        | 0.424        |
| T1022s1        | 2                     | 2-157;158-224;                                  | 2                             | 1-171;172-229;                                          | 0.856        | 0.375        | 0.534        |
| <b>Average</b> |                       |                                                 |                               |                                                         | <b>0.739</b> | <b>0.400</b> | <b>0.468</b> |

Targets with “\*” mark are assessed as FM-sp targets which means the CASP assessor assessed the model quality using the full-length structure.
